# Supplementary material for: Efficient phenanthroimidazole-styryl-triphenylamine derivatives for blue OLEDs: a combined experimental and theoretical study
Source: Royal Society of Chemistry journal article supplement (doi:10.1039/c6nj03801h), 2017-01-01

**Efficient Phenanthroimidazole–Styryl–Triphenylamine Derivatives for Blue OLEDs : A  
Combined Experimental and Theoretical Study**

**Venugopal Thanikachalam\*, Elayaperumal Saroj Purani, Jayaraman Jayabharathi,  
Palanivel Jeeva.**

*Department of Chemistry, Annamalai University, Annamalainagar 608 002, Tamilnadu, India*

\* Address for correspondence

Dr. V. Thanikachalam  
Professor of Chemistry  
Department of Chemistry  
Annamalai University  
Annamalainagar 608 002  
Tamilnadu, India.  
Tel: +91 9488476098  
E-mail: [vtchalam2005@yahoo.com](mailto:vtchalam2005@yahoo.com)

**Contents****1. Tables- S1-S7****2. Figures- S1-S13**

**Table S1. Photophysical properties of TPA–BDIS in different solvents**

| <b>Solvents</b>     | $\epsilon$ | <b>n</b> | <b>f(<math>\epsilon</math>,n)</b> | <b>ET(30)</b> | $\lambda_{ab}$<br>(nm) | $\nu_{ab}$<br>( $\text{cm}^{-1}$ ) | $\lambda_{flu}$<br>(nm) | $\nu_{flu}$<br>( $\text{cm}^{-1}$ ) | $\nu_{ss}$<br>( $\text{cm}^{-1}$ ) | $\Delta G$<br>(kcal/mol) | $\Delta(\Delta G_{hex}-\Delta G_{sol})$<br>(kcal/mol) | $\lambda$<br>(kcal/mol) |
|---------------------|------------|----------|-----------------------------------|---------------|------------------------|------------------------------------|-------------------------|-------------------------------------|------------------------------------|--------------------------|-------------------------------------------------------|-------------------------|
| Hexane              | 1.88       | 1.370    | 0.0012                            | 32.4          | 366                    | 27322.40                           | 379                     | 26385.22                            | 937.1801                           | 76.76                    | 0.00                                                  | 1.34                    |
| Dioxane             | 2.22       | 1.423    | 0.0214                            | 36.0          | 367                    | 27247.96                           | 382                     | 26178.01                            | 1069.946                           | 76.36                    | 0.40                                                  | 1.53                    |
| Toluene             | 2.38       | 1.494    | 0.0140                            | 33.9          | 367                    | 27247.96                           | 383                     | 26109.66                            | 1138.296                           | 76.26                    | 0.50                                                  | 1.63                    |
| Carbontetrachloride | 2.24       | 1.460    | 0.0111                            | 39.1          | 365                    | 27397.26                           | 384                     | 26041.67                            | 1355.594                           | 76.38                    | 0.38                                                  | 1.94                    |
| Benzene             | 2.28       | 1.426    | 0.0027                            | 34.3          | 368                    | 27173.91                           | 387                     | 25839.79                            | 1334.12                            | 75.77                    | 0.99                                                  | 1.91                    |
| Triethylamine       | 3.13       | 1.432    | 0.0480                            | 31.2          | 367                    | 27247.96                           | 389                     | 25706.94                            | 1541.016                           | 75.69                    | 1.07                                                  | 2.20                    |
| Butylether          | 3.57       | 1.421    | 0.0960                            | 33.4          | 365                    | 27397.26                           | 390                     | 25641.03                            | 1756.235                           | 75.81                    | 0.95                                                  | 2.51                    |
| Ether               | 4.27       | 1.353    | 0.1670                            | 34.4          | 365                    | 27397.26                           | 393                     | 25445.29                            | 1951.968                           | 75.53                    | 1.23                                                  | 2.79                    |
| Isopropylether      | 3.88       | 1.368    | 0.1450                            |               | 366                    | 27322.40                           | 394                     | 25380.71                            | 1941.694                           | 75.33                    | 1.43                                                  | 2.78                    |
| Chloroform          | 4.81       | 1.446    | 0.1492                            | 39.1          | 367                    | 27247.96                           | 395                     | 25316.46                            | 1931.501                           | 75.13                    | 1.63                                                  | 2.76                    |
| Ethyl acetate       | 6.09       | 1.413    | 0.2000                            | 38.1          | 362                    | 27624.31                           | 398                     | 25125.63                            | 2498.681                           | 75.39                    | 1.37                                                  | 3.57                    |
| THF                 | 7.52       | 1.405    | 0.2106                            | 37.4          | 366                    | 27322.40                           | 421                     | 23752.97                            | 3569.435                           | 73.00                    | 3.76                                                  | 5.10                    |
| Methylenechloride   | 7.98       | 1.427    | 0.0111                            | 39.1          | 367                    | 27247.96                           | 423                     | 23640.66                            | 3607.294                           | 72.73                    | 4.03                                                  | 5.16                    |
| Dimethylformamide   | 8.36       | 1.413    | 0.2766                            | 39.8          | 365                    | 27397.26                           | 426                     | 23474.18                            | 3923.082                           | 72.71                    | 4.05                                                  | 5.61                    |
| Dichloromethane     | 9.08       | 1.424    | 0.2173                            | 40.7          | 369                    | 27100.27                           | 428                     | 23364.49                            | 3735.785                           | 72.13                    | 4.63                                                  | 5.34                    |
| Acetone             | 21.01      | 1.359    | 0.2848                            | 42.2          | 365                    | 27397.26                           | 431                     | 23201.86                            | 4195.404                           | 72.32                    | 4.44                                                  | 6.00                    |
| Acetonitrile        | 37.50      | 1.344    | 0.3054                            | 45.6          | 362                    | 27624.31                           | 434                     | 23041.47                            | 4582.835                           | 72.41                    | 4.35                                                  | 6.55                    |

**Table S2. Photophysical properties of TPA–BPIS in different solvents**

| Solvents            | $\epsilon$ | n     | f( $\epsilon$ ,n) | ET(30) | $\lambda_{ab}$<br>(nm) | $\nu_{ab}$<br>( $\text{cm}^{-1}$ ) | $\lambda_{flu}$<br>(nm) | $\nu_{flu}$<br>( $\text{cm}^{-1}$ ) | $\nu_{ss}$<br>( $\text{cm}^{-1}$ ) | $\Delta G$<br>(kcal/mol) | $\Delta(\Delta G_{hex}-\Delta G_{sol})$<br>(kcal/mol) | $\lambda$<br>(kcal/mol) |
|---------------------|------------|-------|-------------------|--------|------------------------|------------------------------------|-------------------------|-------------------------------------|------------------------------------|--------------------------|-------------------------------------------------------|-------------------------|
| Hexane              | 1.88       | 1.370 | 0.0012            | 32.4   | 373                    | 26809.65                           | 414                     | 24154.59                            | 2655.062                           | 72.84                    | 0.04                                                  | 3.79                    |
| Dioxane             | 2.22       | 1.423 | 0.0214            | 36.0   | 371                    | 26954.18                           | 416                     | 24038.46                            | 2915.716                           | 72.88                    | 0.00                                                  | 4.17                    |
| Toluene             | 2.38       | 1.494 | 0.0140            | 33.9   | 374                    | 26737.97                           | 417                     | 23980.82                            | 2757.153                           | 72.49                    | 0.39                                                  | 3.94                    |
| Carbontetrachloride | 2.24       | 1.460 | 0.0111            | 39.1   | 372                    | 26881.72                           | 417                     | 23980.82                            | 2900.905                           | 72.70                    | 0.18                                                  | 4.15                    |
| Benzene             | 2.28       | 1.426 | 0.0027            | 34.3   | 373                    | 26809.65                           | 419                     | 23866.35                            | 2943.303                           | 72.43                    | 0.45                                                  | 4.21                    |
| Triethylamine       | 3.13       | 1.432 | 0.0480            | 31.2   | 373                    | 26809.65                           | 421                     | 23752.97                            | 3056.682                           | 72.27                    | 0.61                                                  | 4.37                    |
| Butylether          | 3.57       | 1.421 | 0.0960            | 33.4   | 373                    | 26809.65                           | 423                     | 23640.66                            | 3168.99                            | 72.11                    | 0.77                                                  | 4.53                    |
| Ether               | 4.27       | 1.353 | 0.1670            | 34.4   | 372                    | 26881.72                           | 426                     | 23474.18                            | 3407.542                           | 71.97                    | 0.91                                                  | 4.87                    |
| Isopropylether      | 3.88       | 1.368 | 0.1450            |        | 373                    | 26809.65                           | 426                     | 23474.18                            | 3335.473                           | 71.87                    | 1.01                                                  | 4.77                    |
| Chloroform          | 4.81       | 1.446 | 0.1492            | 39.1   | 374                    | 26737.97                           | 427                     | 23419.20                            | 3318.764                           | 71.69                    | 1.19                                                  | 4.74                    |
| Ethyl acetate       | 6.09       | 1.413 | 0.2000            | 38.1   | 369                    | 27100.27                           | 429                     | 23310.02                            | 3790.248                           | 72.05                    | 0.83                                                  | 5.42                    |
| THF                 | 7.52       | 1.405 | 0.2106            | 37.4   | 374                    | 26737.97                           | 430                     | 23255.81                            | 3482.154                           | 71.45                    | 1.43                                                  | 4.98                    |
| Methylenechloride   | 7.98       | 1.427 | 0.0111            | 39.1   | 374                    | 26737.97                           | 434                     | 23041.47                            | 3696.493                           | 71.15                    | 1.73                                                  | 5.28                    |
| Dimethylformamide   | 8.36       | 1.413 | 0.2766            | 39.8   | 371                    | 26954.18                           | 438                     | 22831.05                            | 4123.128                           | 71.16                    | 1.72                                                  | 5.89                    |
| Dichloromethane     | 9.08       | 1.424 | 0.2173            | 40.7   | 376                    | 26595.74                           | 439                     | 22779.04                            | 3816.701                           | 70.57                    | 2.31                                                  | 5.46                    |
| Acetone             | 21.01      | 1.359 | 0.2848            | 42.2   | 377                    | 26525.2                            | 440                     | 22727.27                            | 3797.926                           | 70.39                    | 2.49                                                  | 5.43                    |
| Acetonitrile        | 37.50      | 1.344 | 0.3054            | 45.6   | 369                    | 27100.27                           | 444                     | 22522.52                            | 4577.748                           | 70.92                    | 1.96                                                  | 6.54                    |

**Table S3. Photophysical properties of Cz–BPIS in different solvents**

| Solvents            | $\epsilon$ | n     | f( $\epsilon, n$ ) | ET(30) | $\lambda_{ab}$<br>(nm) | $\nu_{ab}$<br>( $\text{cm}^{-1}$ ) | $\lambda_{flu}$<br>(nm) | $\nu_{flu}$<br>( $\text{cm}^{-1}$ ) | $\nu_{ss}$<br>( $\text{cm}^{-1}$ ) | $\Delta G$<br>(kcal/mol) | $\Delta(\Delta G_{hex} - \Delta G_{sol})$<br>(kcal/mol) | $\lambda$<br>(kcal/mol) |
|---------------------|------------|-------|--------------------|--------|------------------------|------------------------------------|-------------------------|-------------------------------------|------------------------------------|--------------------------|---------------------------------------------------------|-------------------------|
| Hexane              | 1.88       | 1.370 | 0.001              | 32.4   | 357                    | 28011.20                           | 404                     | 24752.48                            | 3258.729                           | 75.41                    | 0.00                                                    | 4.66                    |
| Dioxane             | 2.22       | 1.423 | 0.021              | 36.0   | 358                    | 27932.96                           | 405                     | 24691.36                            | 3241.603                           | 75.21                    | 0.20                                                    | 4.63                    |
| Toluene             | 2.38       | 1.494 | 0.014              | 33.9   | 356                    | 28089.89                           | 406                     | 24630.54                            | 3459.346                           | 75.35                    | 0.06                                                    | 4.94                    |
| Carbontetrachloride | 2.24       | 1.460 | 0.011              | 39.1   | 356                    | 28089.89                           | 406                     | 24630.54                            | 3459.346                           | 75.35                    | 0.06                                                    | 4.94                    |
| Benzene             | 2.28       | 1.426 | 0.003              | 34.3   | 359                    | 27855.15                           | 407                     | 24570.02                            | 3285.129                           | 74.93                    | 0.48                                                    | 4.70                    |
| Triethylamine       | 3.13       | 1.432 | 0.048              | 31.2   | 357                    | 28011.20                           | 409                     | 24449.88                            | 3561.327                           | 74.98                    | 0.43                                                    | 5.09                    |
| Butylether          | 3.57       | 1.421 | 0.096              | 33.4   | 356                    | 28089.89                           | 410                     | 24390.24                            | 3699.644                           | 75.01                    | 0.40                                                    | 5.29                    |
| Ether               | 4.27       | 1.353 | 0.167              | 34.4   | 356                    | 28089.89                           | 412                     | 24271.84                            | 3818.043                           | 74.84                    | 0.57                                                    | 5.46                    |
| Isopropylether      | 3.88       | 1.368 | 0.145              |        | 356                    | 28089.89                           | 412                     | 24271.84                            | 3818.043                           | 74.84                    | 0.57                                                    | 5.46                    |
| Chloroform          | 4.81       | 1.446 | 0.149              | 39.1   | 359                    | 27855.15                           | 413                     | 24213.08                            | 3642.078                           | 74.42                    | 0.99                                                    | 5.21                    |
| Ethyl acetate       | 6.09       | 1.413 | 0.200              | 38.1   | 353                    | 28328.61                           | 415                     | 24096.39                            | 4232.226                           | 74.93                    | 0.48                                                    | 6.05                    |
| THF                 | 7.52       | 1.405 | 0.211              | 37.4   | 357                    | 28011.20                           | 417                     | 23980.82                            | 4030.389                           | 74.31                    | 1.10                                                    | 5.76                    |
| Methylenechloride   | 7.98       | 1.427 | 0.011              | 39.1   | 358                    | 27932.96                           | 418                     | 23923.44                            | 4009.516                           | 74.12                    | 1.29                                                    | 5.73                    |
| Dimethylformamide   | 8.36       | 1.413 | 0.277              | 39.8   | 354                    | 28248.59                           | 421                     | 23752.97                            | 4495.618                           | 74.32                    | 1.09                                                    | 6.43                    |
| Dichloromethane     | 9.08       | 1.424 | 0.217              | 40.7   | 360                    | 27777.78                           | 422                     | 23696.68                            | 4081.095                           | 73.57                    | 1.84                                                    | 5.83                    |
| Acetone             | 21.01      | 1.359 | 0.285              | 42.2   | 355                    | 28169.01                           | 426                     | 23474.18                            | 4694.836                           | 73.81                    | 1.60                                                    | 6.71                    |
| Acetonitrile        | 37.50      | 1.344 | 0.305              | 45.6   | 353                    | 28328.61                           | 427                     | 23419.2                             | 4909.408                           | 73.96                    | 1.45                                                    | 7.02                    |

**Table S4. Analysis of hole (H), electron (E), their overlap, dipolemoment (D) and charge density difference ( $D_{H-E}$ ) of TPA-BDIS.**

| States     | Integral of hole | Integral of electron | Integral of transition density | Integral overlap of H-E | Centeroid of hole ( $\text{Å}^\circ$ ) |         |        | Centeroid of electron ( $\text{Å}^\circ$ ) |         |         | $D_{H-E}$ ( $\text{Å}^\circ$ ) | D (a.u.) |
|------------|------------------|----------------------|--------------------------------|-------------------------|----------------------------------------|---------|--------|--------------------------------------------|---------|---------|--------------------------------|----------|
|            |                  |                      |                                |                         | X                                      | Y       | Z      | X                                          | Y       | Z       |                                |          |
| <b>S1</b>  | 0.4472           | 0.7093               | 0.0034                         | 0.1420                  | 8.6129                                 | -1.7891 | 0.3327 | 7.7987                                     | -0.9982 | -0.1147 | 1.2201                         | 1.3334   |
| <b>S2</b>  | 0.4577           | 0.7205               | 0.0026                         | 0.1635                  | 8.6129                                 | -1.7891 | 0.3327 | 8.1322                                     | -2.3283 | 0.6208  | 0.7777                         | 0.8658   |
| <b>S3</b>  | 0.4325           | 0.6631               | -0.0007                        | 0.0998                  | 8.6129                                 | -1.7891 | 0.3327 | 7.4861                                     | -1.5619 | 0.2339  | 1.1536                         | 1.1842   |
| <b>S4</b>  | 0.4469           | 0.6862               | -0.0001                        | 0.0871                  | 8.6129                                 | -1.7891 | 0.3327 | 7.8787                                     | -2.3688 | 0.6387  | 0.9843                         | 1.0539   |
| <b>S5</b>  | 0.4591           | 0.7624               | 0.0027                         | 0.0158                  | 8.6129                                 | -1.7891 | 0.3327 | 2.2346                                     | -1.2372 | 0.1320  | 6.4189                         | 7.4090   |
| <b>S6</b>  | 0.4234           | 0.7057               | 0.0384                         | 0.0996                  | 8.2317                                 | -1.7543 | 0.3072 | 6.9380                                     | -1.1172 | -0.0671 | 1.4899                         | 0.8856   |
| <b>S7</b>  | 0.4525           | 0.6242               | -0.0028                        | 0.0540                  | 8.6129                                 | -1.7891 | 0.3327 | 5.9075                                     | -1.5935 | 0.1567  | 2.7182                         | 2.7657   |
| <b>S8</b>  | 0.4016           | 0.7115               | -0.0730                        | 0.0631                  | 8.6129                                 | -1.7891 | 0.3327 | 6.1889                                     | -1.6230 | 0.1804  | 2.4343                         | 1.4104   |
| <b>S9</b>  | 0.4425           | 0.6794               | -0.0038                        | 0.0096                  | 8.6129                                 | -1.7891 | 0.3327 | -1.2925                                    | -1.1418 | -0.1767 | 9.9396                         | 10.5369  |
| <b>S10</b> | 0.4431           | 0.5286               | -0.0045                        | 0.0736                  | 8.6129                                 | -1.7891 | 0.3327 | 8.1509                                     | -0.2232 | -0.5226 | 1.8431                         | 1.6922   |

**Table S5. Analysis of hole (H), electron (E), their overlap, dipolemoment (D) and charge density difference ( $D_{H-E}$ ) of TPA-BPIS**

| States     | Integral of hole | Integral of electron | Integral of transition density | Integral overlap of H-E | Centeroid of hole ( $\text{Å}^\circ$ ) |         |        | Centeroid of electron ( $\text{Å}^\circ$ ) |         |        | $D_{H-E}$ ( $\text{Å}^\circ$ ) | D (a.u.) |
|------------|------------------|----------------------|--------------------------------|-------------------------|----------------------------------------|---------|--------|--------------------------------------------|---------|--------|--------------------------------|----------|
|            |                  |                      |                                |                         | X                                      | Y       | Z      | X                                          | Y       | Z      |                                |          |
| <b>S1</b>  | 0.8604           | 0.6702               | 0.0036                         | 0.4249                  | -3.6960                                | -1.7061 | 0.1823 | -3.4463                                    | -1.5785 | 0.2043 | 0.2812                         | 0.4068   |
| <b>S2</b>  | 0.9026           | 0.6690               | 0.0012                         | 0.5249                  | -5.5298                                | -2.0682 | 0.1874 | -6.6843                                    | -2.0224 | 0.3783 | 1.1710                         | 1.7390   |
| <b>S3</b>  | 0.9092           | 0.6863               | 0.0138                         | 0.5273                  | -1.7058                                | -1.5927 | 0.1716 | -2.3238                                    | -1.5149 | 0.2860 | 0.6336                         | 0.9553   |
| <b>S4</b>  | 0.8129           | 0.6065               | 0.0042                         | 0.3702                  | -3.6357                                | -1.8358 | 0.1709 | -1.7380                                    | -1.8401 | 0.0367 | 1.9024                         | 2.5516   |
| <b>S5</b>  | 0.7886           | 0.5696               | 0.0006                         | 0.2541                  | 6.4788                                 | -0.7468 | 0.1458 | 5.8442                                     | -0.7686 | 0.2063 | 0.6378                         | 0.8186   |
| <b>S6</b>  | 0.8581           | 0.6255               | 0.0001                         | 0.3437                  | 8.3308                                 | -0.6598 | 0.1038 | 9.6999                                     | -0.4626 | 0.2096 | 1.3872                         | 1.9448   |
| <b>S7</b>  | 0.9179           | 0.6261               | 0.0005                         | 0.5228                  | 1.8069                                 | -0.9789 | 0.2395 | 1.5428                                     | -1.0037 | 0.2869 | 0.2694                         | 0.3931   |
| <b>S8</b>  | 0.8300           | 0.5717               | 0.0002                         | 0.3740                  | 7.3250                                 | -0.6942 | 0.1411 | 8.6124                                     | -0.7174 | 0.0143 | 1.2938                         | 1.7138   |
| <b>S9</b>  | 0.8945           | 0.6132               | 0.0041                         | 0.4420                  | 8.5974                                 | -0.6482 | 0.0958 | 9.1595                                     | -0.6080 | 0.1182 | 0.5640                         | 0.8035   |
| <b>S10</b> | 0.7962           | 0.5762               | -0.0125                        | 0.3807                  | 2.1754                                 | -1.1935 | 0.1409 | 1.8447                                     | -1.2079 | 0.0199 | 0.3524                         | 0.4570   |

Table S6. Analysis of hole (H), electron (E), their overlap, dipolemoment (D) and charge density difference ( $D_{H-E}$ ) of Cz-BPIS.

| States | Integral of hole | Integral of electron | Integral of transition density | Integral overlap of H-E | Centeroid of hole ( $\text{Å}^\circ$ ) |       |       | Centeroid of electron ( $\text{Å}^\circ$ ) |        |        | $D_{H-E}$ ( $\text{Å}^\circ$ ) | D (a.u.) |
|--------|------------------|----------------------|--------------------------------|-------------------------|----------------------------------------|-------|-------|--------------------------------------------|--------|--------|--------------------------------|----------|
|        |                  |                      |                                |                         | X                                      | Y     | Z     | X                                          | Y      | Z      |                                |          |
| S1     | 0.454            | 0.603                | 0.014                          | 0.171                   | 4.406                                  | 0.660 | 0.024 | 4.875                                      | -0.695 | 0.307  | 1.462                          | 1.461    |
| S2     | 0.454            | 0.624                | 0.099                          | 0.099                   | 4.406                                  | 0.660 | 0.024 | 3.384                                      | -1.485 | -0.088 | 2.379                          | 2.424    |
| S3     | 0.439            | 0.556                | 0.627                          | 0.096                   | 4.406                                  | 0.660 | 0.024 | 4.464                                      | -1.437 | 0.193  | 2.105                          | 1.981    |
| S4     | 0.470            | 0.725                | -0.012                         | 0.056                   | 4.406                                  | 0.660 | 0.024 | 1.029                                      | -1.816 | -0.522 | 4.224                          | 4.773    |
| S5     | 0.428            | 0.591                | -0.003                         | 0.047                   | 4.406                                  | 0.660 | 0.024 | 3.992                                      | -3.301 | -0.006 | 3.983                          | 3.840    |
| S6     | 0.475            | 0.703                | -0.010                         | 0.017                   | 4.406                                  | 0.660 | 0.024 | 4.666                                      | 5.779  | 0.069  | 5.125                          | 5.709    |
| S7     | 0.484            | 0.724                | 0.012                          | 0.008                   | 4.406                                  | 0.660 | 0.024 | 4.750                                      | 5.855  | 0.067  | 5.206                          | 5.984    |
| S8     | 0.451            | 0.644                | 0.008                          | 0.041                   | 4.406                                  | 0.660 | 0.024 | -0.173                                     | -1.689 | -0.618 | 5.188                          | 5.266    |
| S9     | 0.415            | 0.559                | -0.005                         | 0.056                   | 4.406                                  | 0.660 | 0.024 | 3.504                                      | -3.187 | 0.040  | 3.952                          | 3.640    |
| S10    | 0.475            | 0.713                | 0.005                          | 0.005                   | 4.406                                  | 0.660 | 0.024 | -4.420                                     | -0.886 | -0.684 | 8.989                          | 10.100   |



| TPA-BDIS   |          |                 | TPA-BDIS   |          |                 | Cz-BDIS    |          |                 |            |
|------------|----------|-----------------|------------|----------|-----------------|------------|----------|-----------------|------------|
| Transition | D (a.u.) | $\Delta E$ (eV) | Transition | D (a.u.) | $\Delta E$ (eV) | Transition | D (a.u.) | $\Delta E$ (eV) | Transition |
| S3→S4      | 1.9459   | 0.30490         | 0.02828    | 0.8222   | 0.39430         | 0.00487    | 2.041    | 0.406           | 0.041      |
| S3→S5      | 0.1280   | 1.17570         | 0.00047    | 0.0887   | 0.34780         | 0.00007    | 1.710    | 1.025           | 0.073      |
| S3→S6      | 0.0032   | 1.81940         | 0.00039    | 0.1430   | 0.47890         | 0.00230    | 5.106    | 2.285           | 0.849      |
| S3→S7      | 1.7098   | 1.90250         | 0.00206    | 0.5803   | 0.51950         | 0.00029    | 4.026    | 1.347           | 0.081      |
| S1→S2      | 0.0838   | 0.2491          | 0.00035    | 0.2146   | 0.55850         | 0.00063    | 0.411    | 1.655           | 0.096      |
| S1→S3      | 0.2846   | 0.3425          | 0.23988    | 5.3468   | 0.70160         | 0.00139    | 3.539    | 1.043           | 0.320      |
| S1→S4      | 0.7726   | 0.6368          | 0.15043    | 3.1051   | 0.61740         | 0.01472    | 1.312    | 1.812           | 0.121      |
| S1→S5      | 0.9467   | 0.6903          | 0.00018    | 0.1046   | 1.87730         | 0.04123    | 4.030    | 1.862           | 0.385      |
| S1→S6      | 0.0106   | 0.8214          | 0.00052    | 0.1612   | 2.53100         | 0.00001    | 2.943    | 2.326           | 0.493      |
| S1→S7      | 1.1013   | 0.8620          | 0.00003    | 0.0386   | 2.60401         | 0.07739    | 0.164    | 3.236           | 0.158      |
| S1→S8      | 0.0885   | 0.9010          | 0.00029    | 0.0346   | 2.76360         | 0.00018    | 3.663    | 0.877           | 0.092      |
| S1→S9      | 1.2172   | 0.9599          | 0.05799    | 0.1268   | 3.05470         | 0.00009    | 3.199    | 2.698           | 0.887      |
| S1→S10     | 1.6232   | 0.9599          | 0.00008    | 0.0567   | 3.05470         | 0.19719    | 3.299    | 0.941           | 0.001      |
| S4→S5      | 0.1264   | 1.75710         | 0.00069    | 0.1595   | 0.26420         | 0.00016    | 1.797    | 2.855           | 0.761      |
| S4→S6      | 1.7201   | 1.0451          | 0.17723    | 2.6309   | 3.27240         | 0.23720    | 1.250    | 2.855           | 0.098      |
| S4→S7      | 4.6383   | 2.04820         | 1.07954    | 0.0973   | 0.32310         | 0.00007    | 0.499    | 1.405           | 0.008      |
| S4→S8      | 1.0582   | 2.26590         | 0.06216    | 1.9834   | 0.40830         | 0.03935    | 1.489    | 1.456           | 0.079      |
| S2→S3      | 1.0193   | 0.09340         | 0.00658    | 1.6957   | 0.58510         | 0.01489    | 4.994    | 0.449           | 0.274      |
| S2→S4      | 0.933    | 0.38770         | 0.01260    | 1.1516   | 0.89000         | 0.02151    | 1.466    | 0.855           | 0.045      |
| S2→S5      | 1.7689   | 0.65370         | 0.05011    | 0.4091   | 0.13110         | 0.00054    | 4.638    | 0.257           | 0.135      |
| S2→S6      | 0.4850   | 0.44120         | 0.00005    | 0.0666   | 1.76080         | 0.01015    | 3.705    | 1.474           | 0.496      |
| S2→S7      | 0.1242   | 0.72680         | 0.08035    | 0.0313   | 2.41450         | 0.00000    | 0.618    | 0.321           | 0.003      |
| S2→S8      | 0.0851   | 0.57230         | 0.00059    | 0.2057   | 2.41450         | 0.00043    | 1.922    | 1.732           | 0.136      |
| S2→S9      | 0.0292   | 0.88630         | 0.00002    | 2.0094   | 0.21070         | 0.02084    | 1.046    | 0.629           | 0.169      |
| S2→S10     | 1.4730   | 0.61290         | 0.00006    | 0.0621   | 2.48760         | 0.13223    | 0.234    | 1.796           | 0.002      |
| S5→S6      | 2.6804   | 1.17740         | 0.20725    | 0.3220   | 0.26960         | 0.00068    | 2.315    | 0.786           | 0.103      |
| S5→S7      | 0.1548   | 0.65190         | 0.00015    | 0.0985   | 2.64710         | 0.00155    | 1.800    | 2.104           | 0.167      |
| S5→S8      | 1.7430   | 1.39510         | 0.10384    | 0.3061   | 0.35480         | 0.00081    | 9.487    | 0.837           | 0.001      |
| S5→S9      | 0.7139   | 0.71080         | 0.00075    | 0.2071   | 2.93820         | 0.03669    | 0.297    | 2.261           | 4.986      |
| S2→S10     | 0.9738   | 0.79600         | 0.00452    | 0.4814   | 3.15590         | 0.07332    | 1.971    | 2.311           | 0.220      |

Table S7. Transition dipole moment (D), oscillator strength (F) and energy ( $\Delta E$ ) difference between the transition states of TPA-BDIS, TPA-BPIS and Cz-BPIS.

Contd....

| TPA-BDIS      |          |                 | TPA-BDIS   |          |                 | Cz-BDIS    |          |                 |            |
|---------------|----------|-----------------|------------|----------|-----------------|------------|----------|-----------------|------------|
| Transition    | D (a.u.) | $\Delta E$ (eV) | Transition | D (a.u.) | $\Delta E$ (eV) | Transition | D (a.u.) | $\Delta E$ (eV) | Transition |
| <b>S6→S7</b>  | 1.3767   | 0.07310         | 0.00339    | 0.1265   | 0.04060         | 0.00002    | 1.392    | 0.064           | 0.003      |
| <b>S6→S8</b>  | 2.0928   | 0.23260         | 0.02496    | 0.2276   | 0.07960         | 0.00010    | 3.521    | 0.372           | 0.113      |
| <b>S6→S9</b>  | 1.7130   | 0.52370         | 0.03765    | 0.2482   | 0.13850         | 0.00021    | 0.768    | 0.528           | 0.007      |
| <b>S6→S10</b> | 0.1228   | 0.74140         | 0.00027    | 1.1587   | 0.22370         | 0.00736    | 0.167    | 0.579           | 0.001      |
| <b>S7→S8</b>  | 0.4642   | 0.15950         | 0.00084    | 0.6040   | 0.03900         | 0.00035    | 0.224    | 0.308           | 0.0003     |
| <b>S7→S9</b>  | 2.8372   | 0.45060         | 0.08887    | 0.1381   | 0.09790         | 0.00005    | 0.404    | 0.464           | 0.018      |
| <b>S7→S10</b> | 1.3537   | 0.66830         | 0.03000    | 0.0926   | 0.18310         | 0.00004    | 0.122    | 0.515           | 0.0001     |
| <b>S8→S9</b>  | 0.6790   | 0.29110         | 0.00329    | 0.1279   | 0.05890         | 0.00002    | 2.284    | 0.156           | 0.020      |
| <b>S9→S10</b> | 1.2686   | 0.50880         | 0.02006    | 0.3442   | 0.14410         | 0.00042    | 2.475    | 0.207           | 0.311      |
| <b>S9→S10</b> | 1.2245   | 0.21770         | 0.00800    | 0.2328   | 0.08520         | 0.00011    | 3.153    | 0.508           | 0.123      |

**Figure S1.** MALDI-TOF mass spectra of BDIS, BPIS, TPA-BDIS, TPA-BPIS and Cz-BPIS.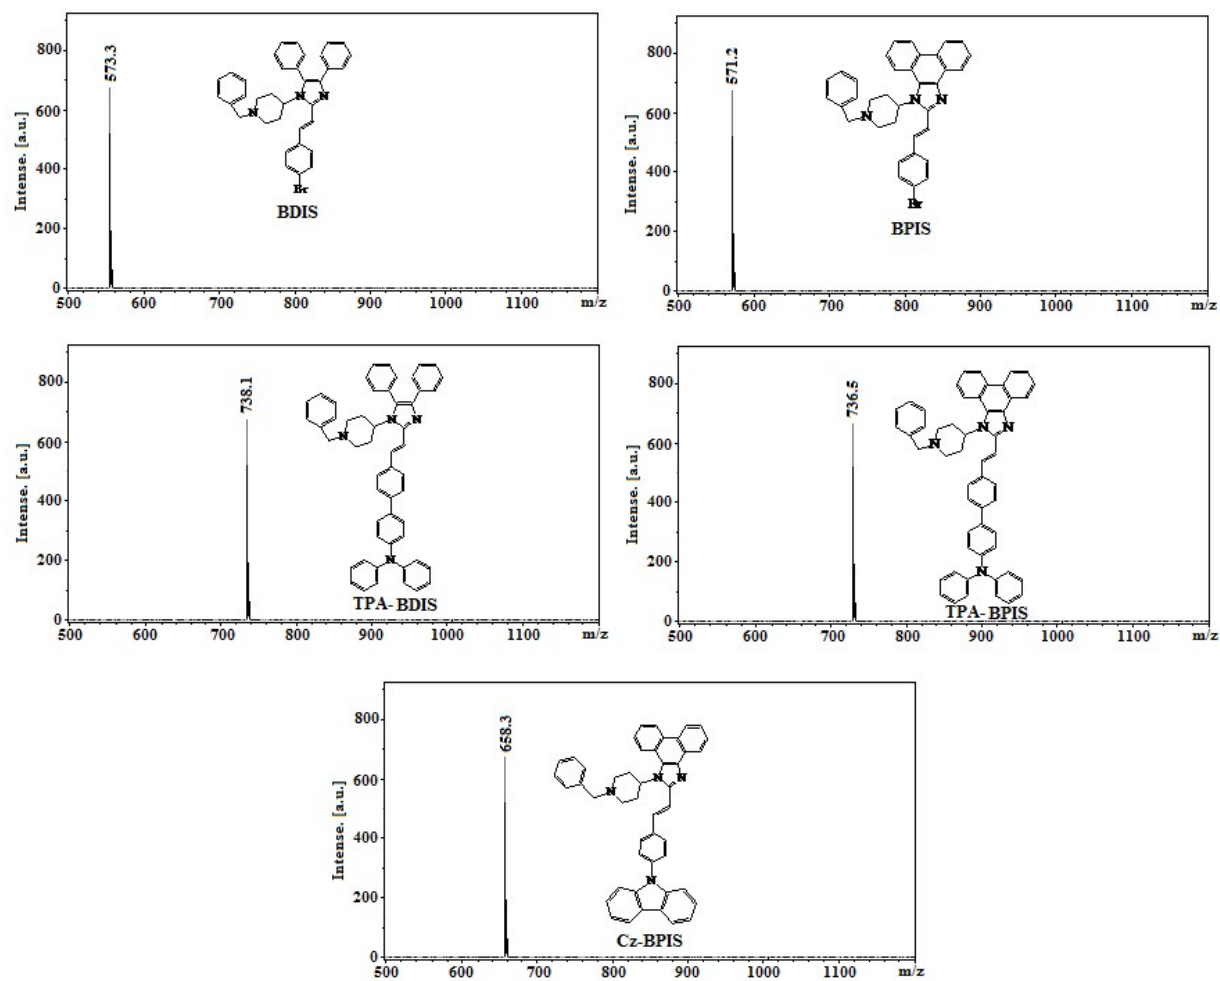

Figure S2. Normalized emission spectra of (a) TPA-BDIS, (b) TPA-BPIS and Cz-BPIS.

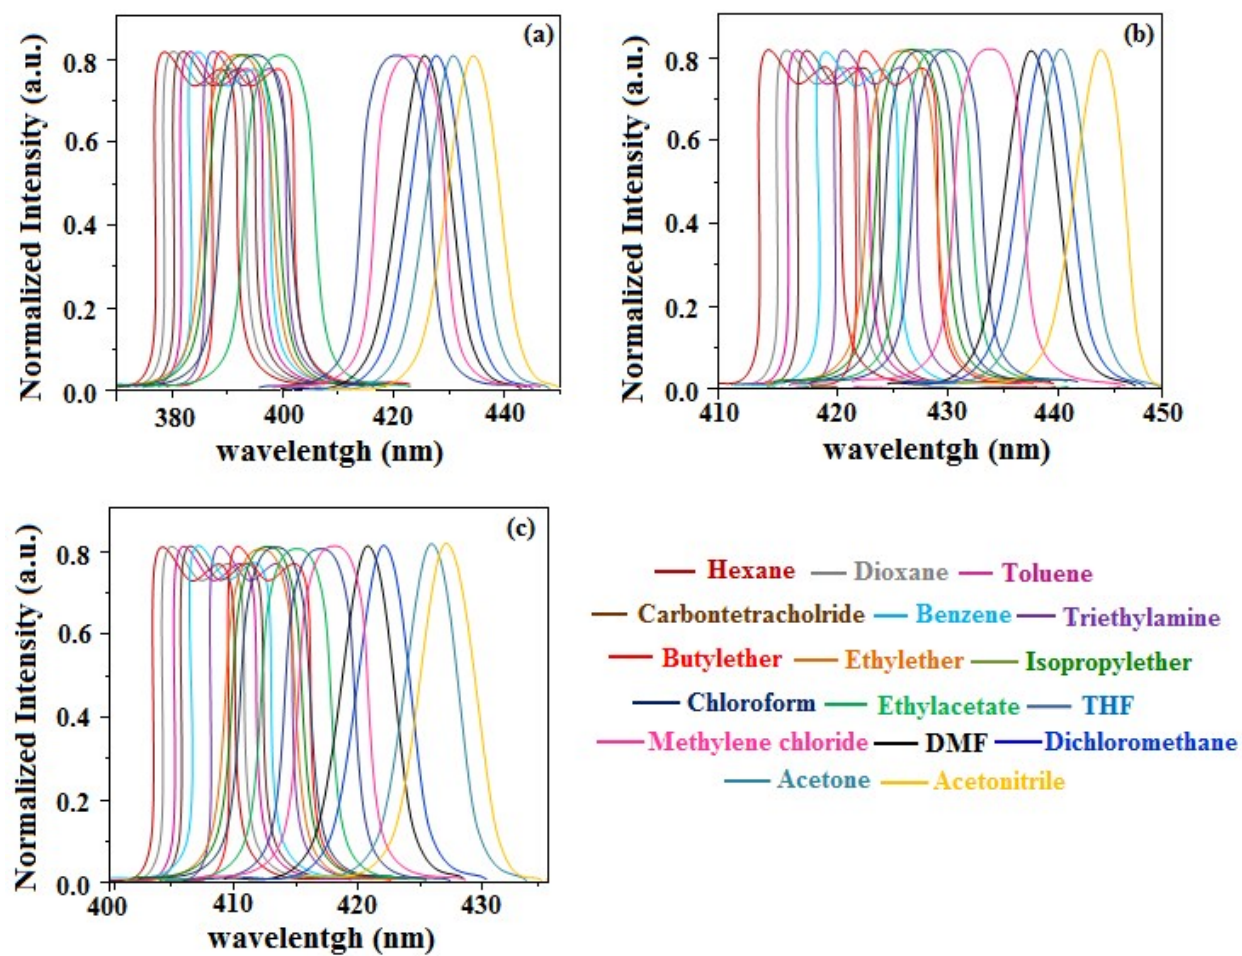

**Figure S3.** Normalized absorption spectra of (a) TPA-BDIS, (b) TPA-BPIS and Cz-BPIS.

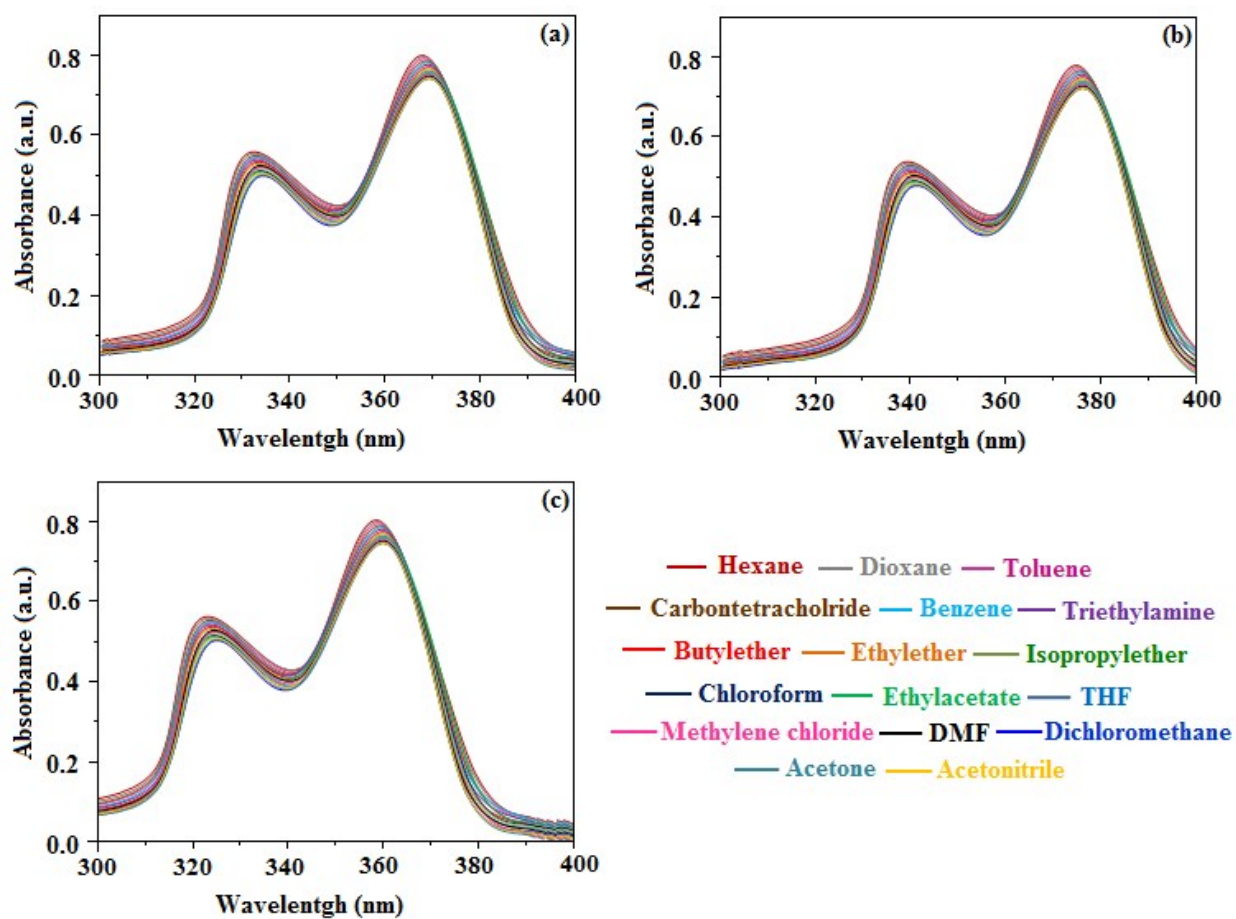

**Figure S4.** (a) Plot of  $\Delta(\Delta G_{\text{hex}} - \Delta G_{\text{sol}})$  versus solvent polarity function  $f(\epsilon, n)$  of TPA-BDIS, TPA-BPIS and Cz-BPIS; (b) Plot of  $\lambda$  (kcal/mol) depends of the solvent polarity function  $f(\epsilon, n)$  of TPA-BDIS and TPA-BPIS and Cz-BPIS.

Estimation of free energy change of solvation ( $\Delta G_{\text{solv}}$ ) and reorganization energies ( $\lambda$ ) in various solvents are displayed in Tables S1 & S2. Marcus shown that  $E(A) = \Delta G_{\text{solv}} + \lambda_1$  and  $E(F) = \Delta G_{\text{solv}} - \lambda_0$ ;  $E(A) + E(F) = 2\Delta G_{\text{solv}}$ ;  $E(A) - E(F) = 2\lambda$  (under,  $\lambda_0 \approx \lambda_1 \approx \lambda$ ), where  $E(A)$  and  $E(F)$  are absorption maxima and fluorescence maxima in  $\text{cm}^{-1}$ , respectively,  $\Delta G_{\text{solv}}$  is difference in free energy of ground and excited states in a given solvent and  $\lambda$  is reorganization energy. The difference between  $\Delta G_{\text{hex}}$  and  $\Delta G_{\text{sol}}$  gives the free energy change required for hydrogen bond formation. The plot of  $\Delta(\Delta G_{\text{solv}})$  against  $f(\epsilon, n)$  has been shown in Figure S4. The definite reorganization energies confirmed the interaction between low frequency motions such as reorientation of solvent cell with low and medium frequency nuclear motion of the solute.

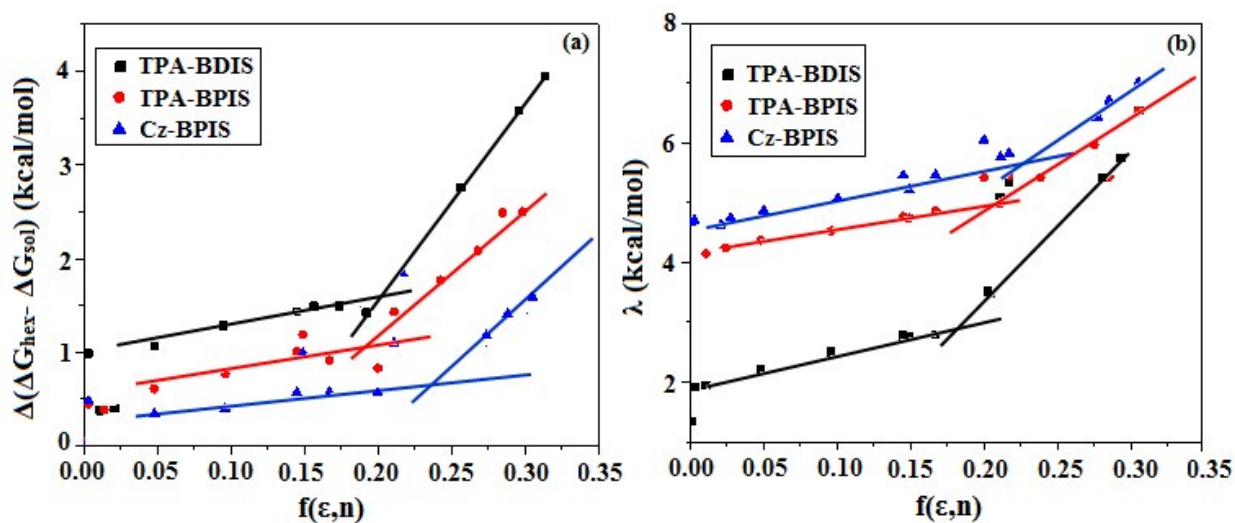

**Figure S5.** Natural transition orbital of TPA-BDIS for S<sub>1</sub>-S<sub>10</sub> transitions.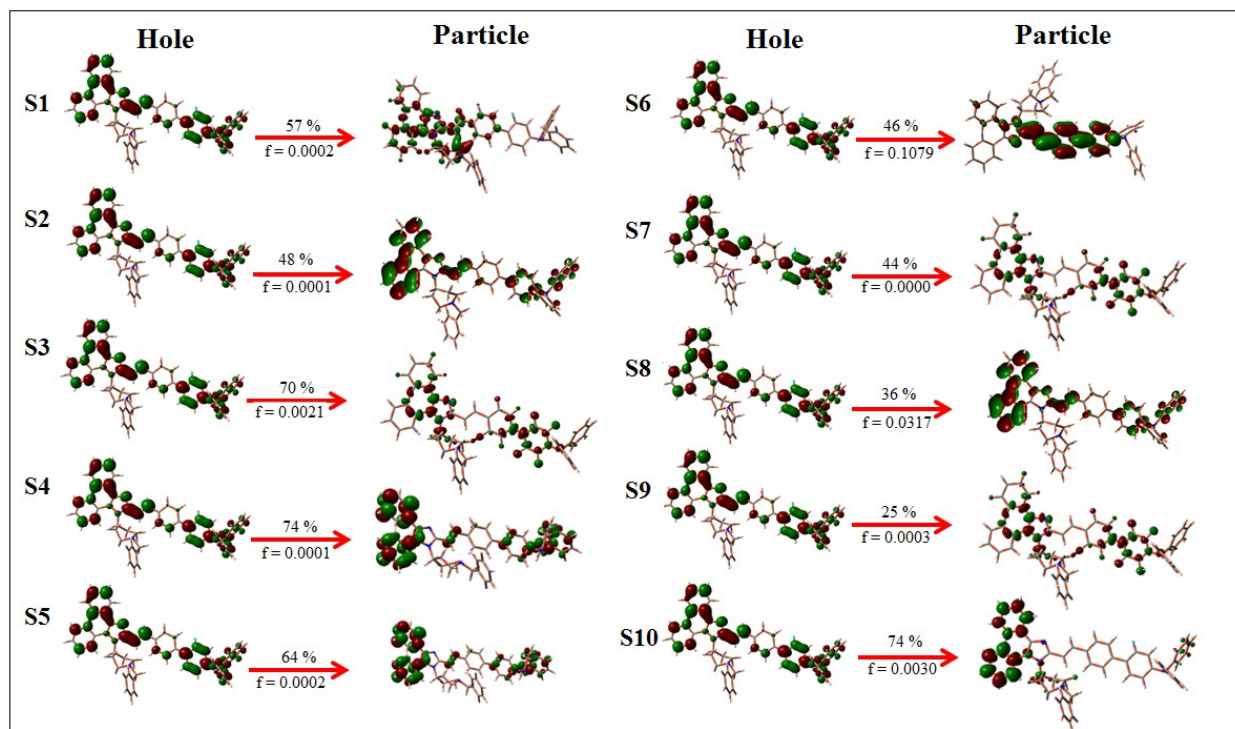

**Figure S6.** Natural transition orbital of TPA–BPIS for  $S_1$ - $S_{10}$  transitions.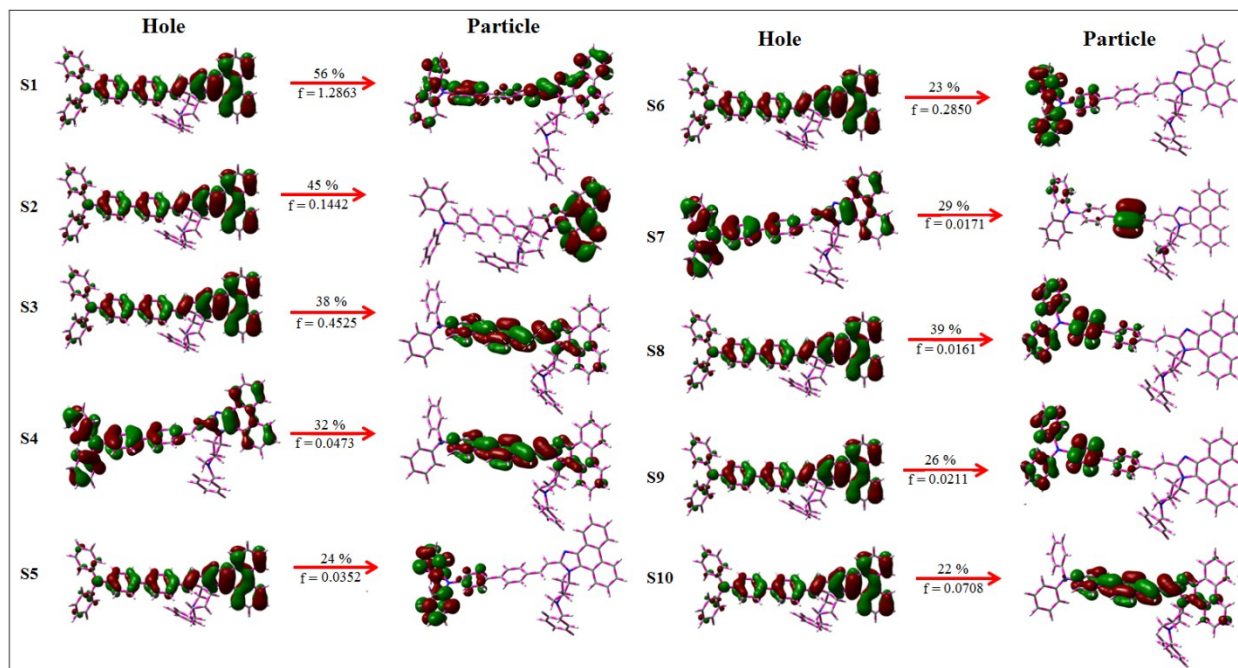



**Figure S7.** Natural transition orbital of Cz-BPIS for S<sub>1</sub>-S<sub>10</sub> transitions.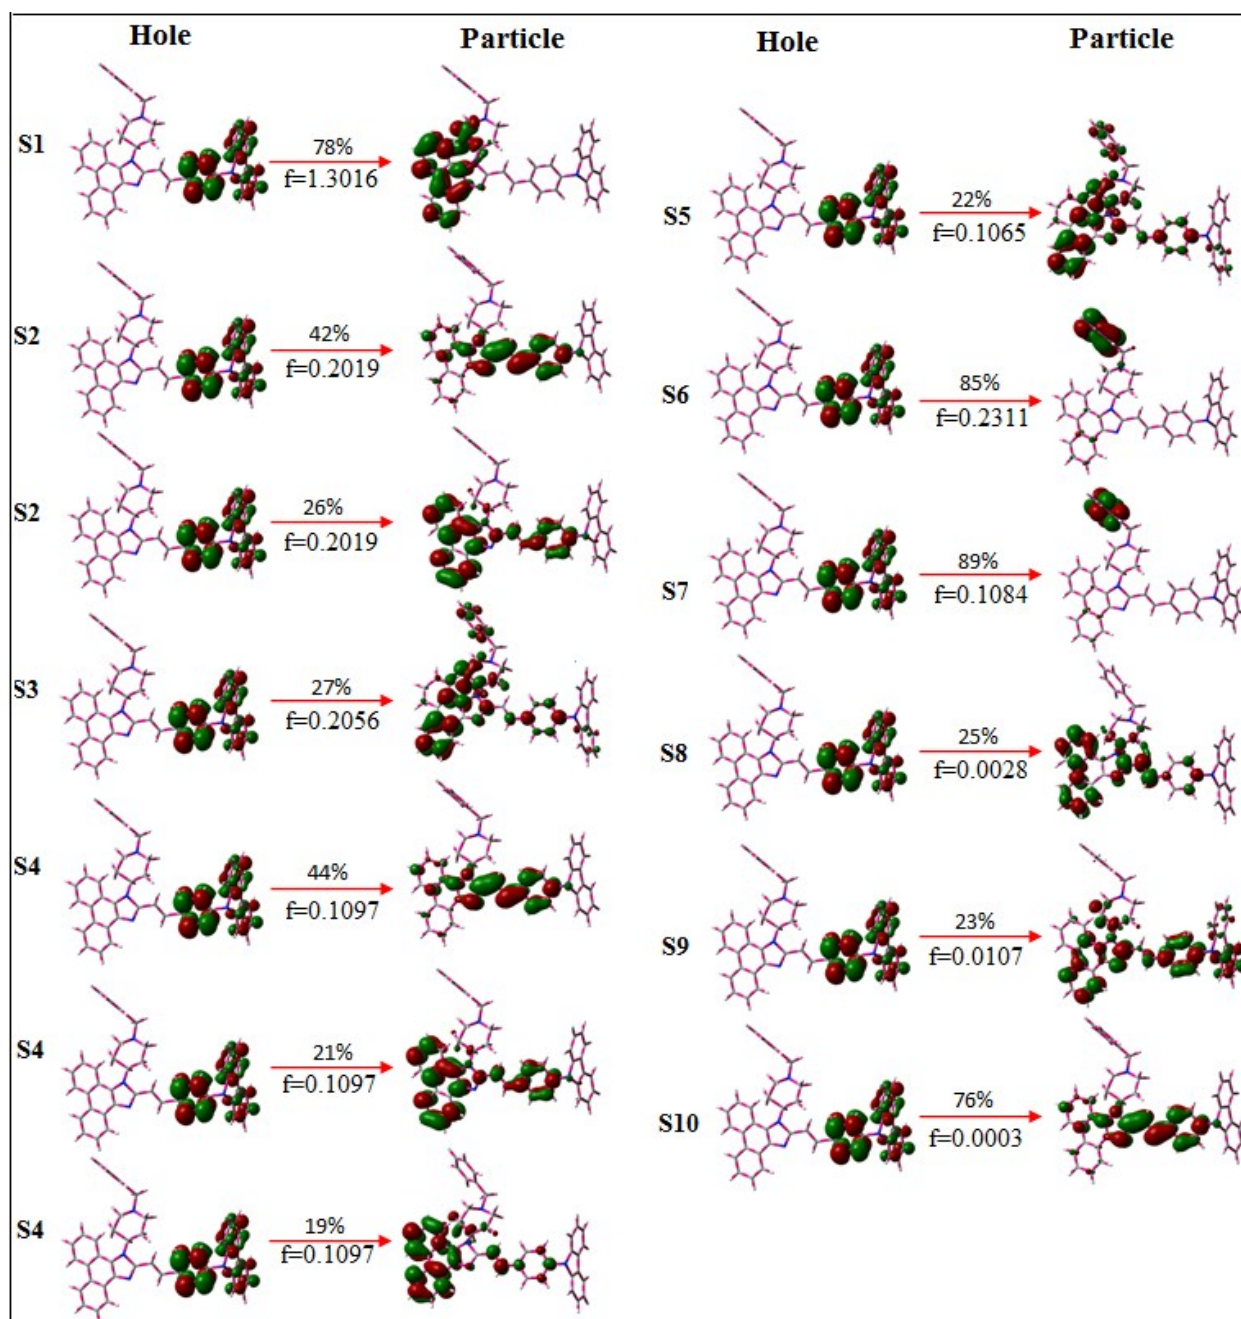

**Figure S8.** Hole-particle distribution of  $S_1$ - $S_{10}$  transition TPA-BDIS. Green and blue areas refer to the zones where electron density increased and decreased respectively.

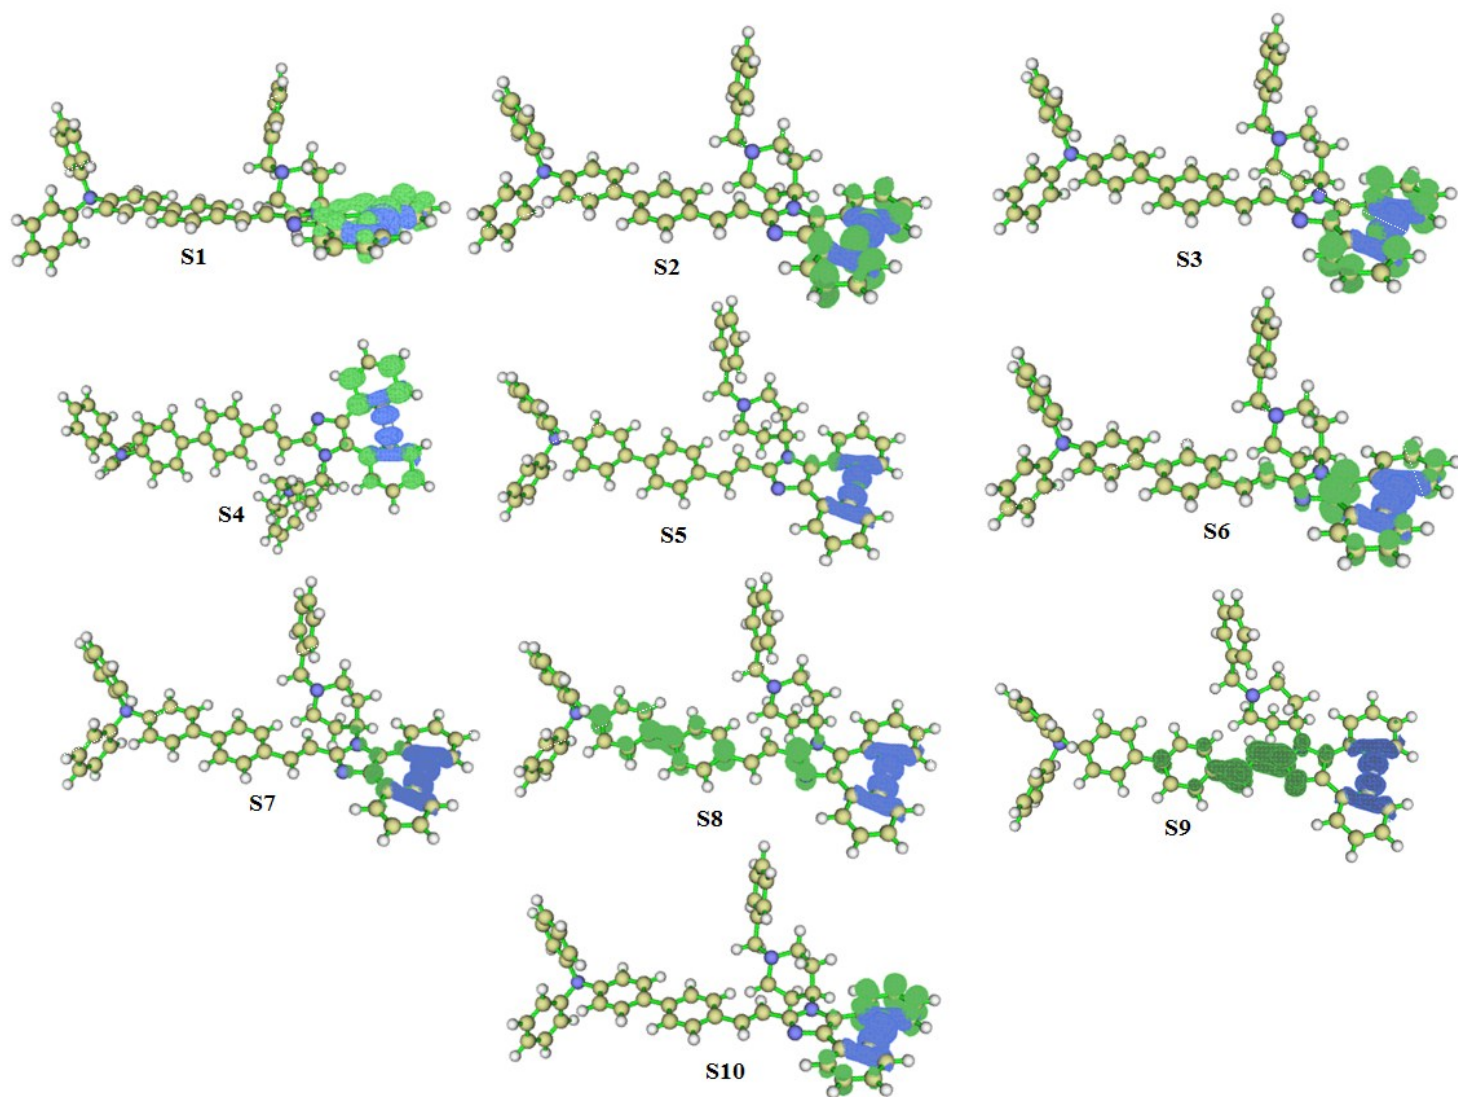

**Figure S9.** Hole-particle distribution of  $S_1$ - $S_{10}$  transition TPA-BPIS. Green and blue areas refer to the zones where electron density increased and decreased respectively

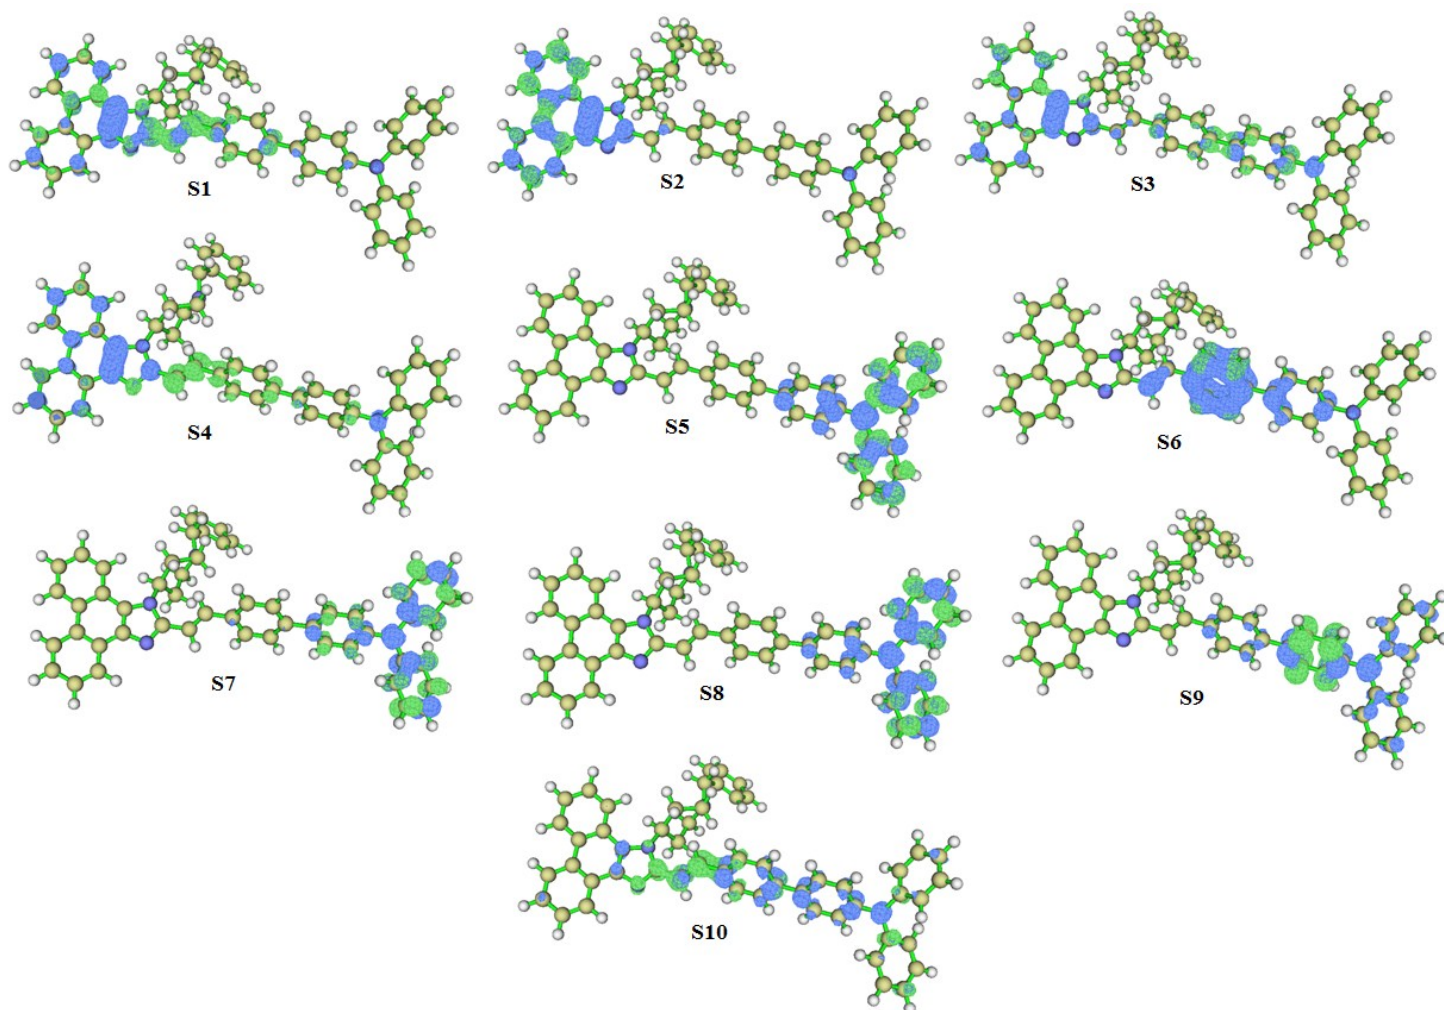

**Figure S10.** Hole-particle distribution of  $S_1$ - $S_{10}$  transition Cz-BPIS. Green and blue areas refer to the zones where electron density increased and decreased respectively.

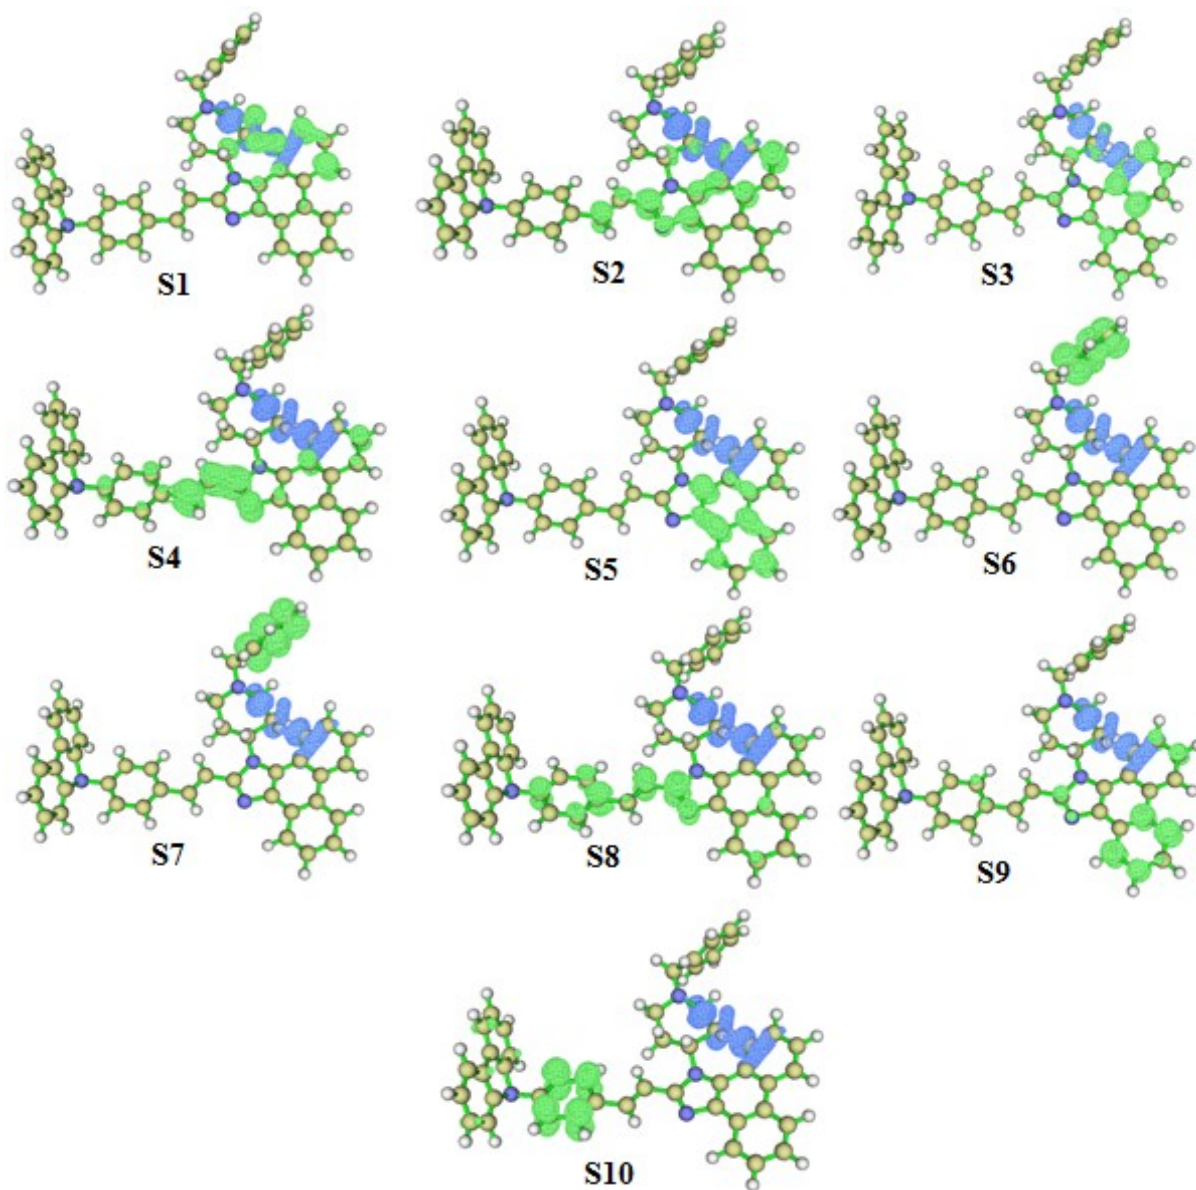

**Figure S11.** Transition density matrix color-filled map of S0 and S5 states of TPA-BDIS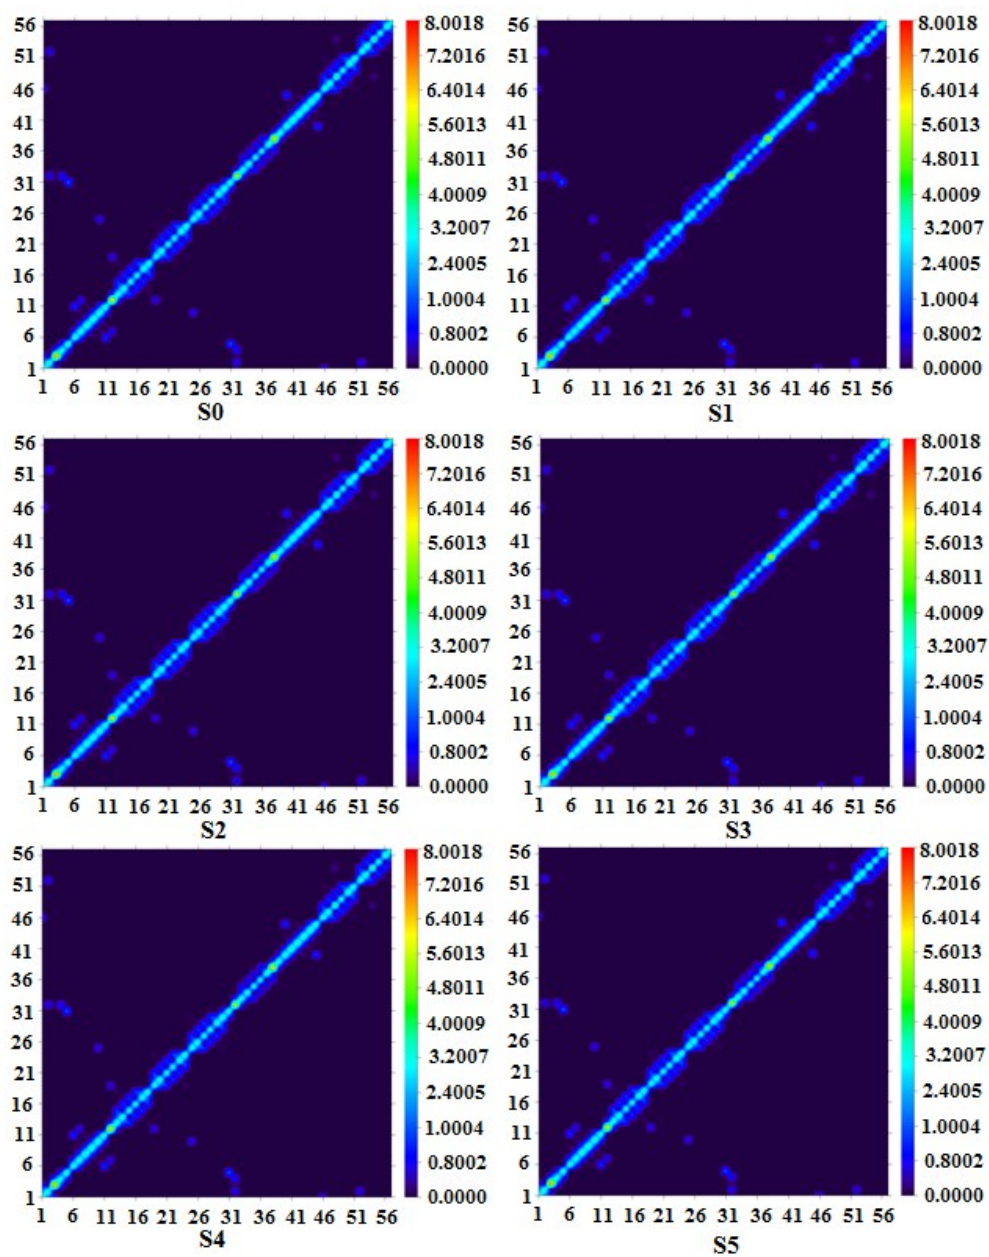

**Figure S12.** Transition density matrix color-filled map of S0 and S10 states of TPA-BPIS.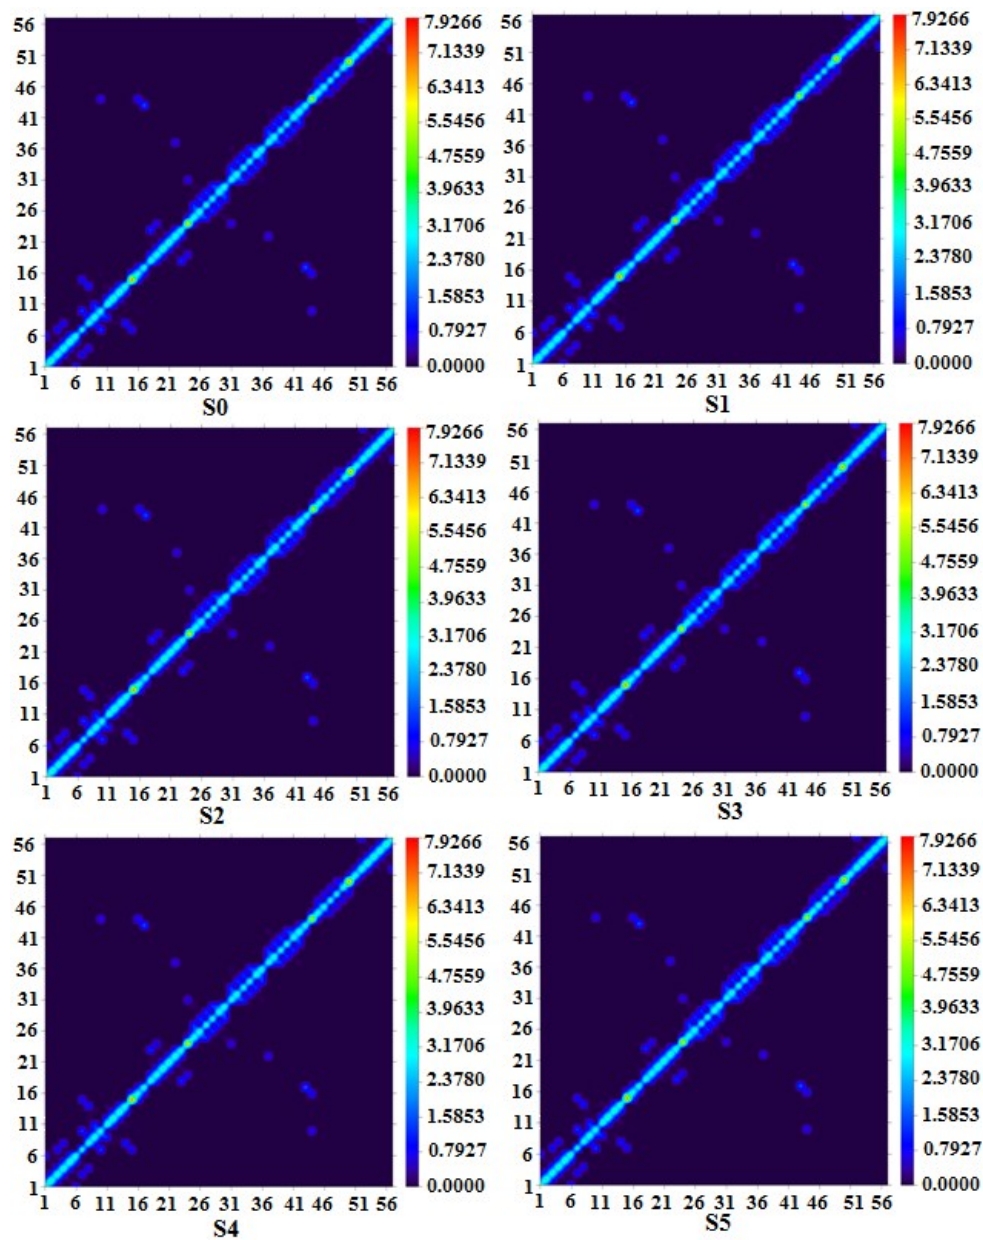

**Figure S13.** Transition density matrix color-filled map of S0 and S5 states of Cz-BPIS.

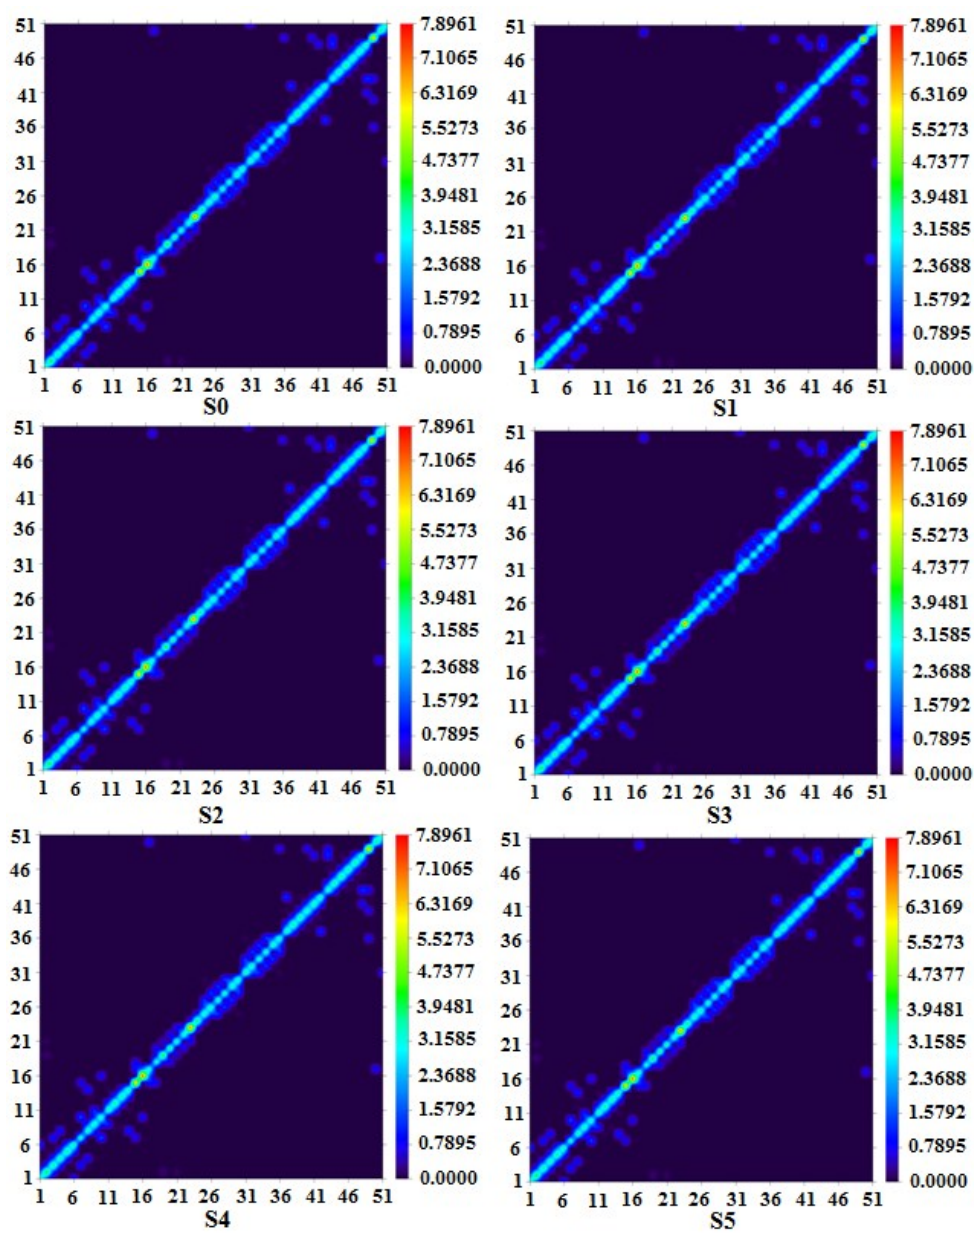

Supplement: c6nj03801h1.pdf [file c6nj03801h1.pdf]
